# Supplementary material for: Ammonium molybdate phosphate functionalized silicon dioxide impregnated in calcium alginate for highly efficient removal of 137Cs from aquatic bodies
Source: Royal Society of Chemistry journal article supplement (doi:10.1039/c6ra20283g), 2016-01-01
Supplement: c6ra20283g1.pdf [file c6ra20283g1.pdf]

**Electronic Supplementary Information (ESI)  
for RSC Advances, The Royal Society of Chemistry**

**Ammonium molybdate phosphate functionalized silicon dioxide  
impregnated in calcium alginate for highly efficient removal of  $^{137}\text{Cs}$  from  
aquatic bodies**

Sudeshna Saha, R.K.Singhal, H. Basu and M.V.Pimple

Analytical Chemistry Division

Bhabha Atomic Research Center, Trombay, Mumbai -400085, India

E mail: [rsinghal@barc.gov.in](mailto:rsinghal@barc.gov.in) ;Tel:91-22-25592233 fax No 91-22-25505151

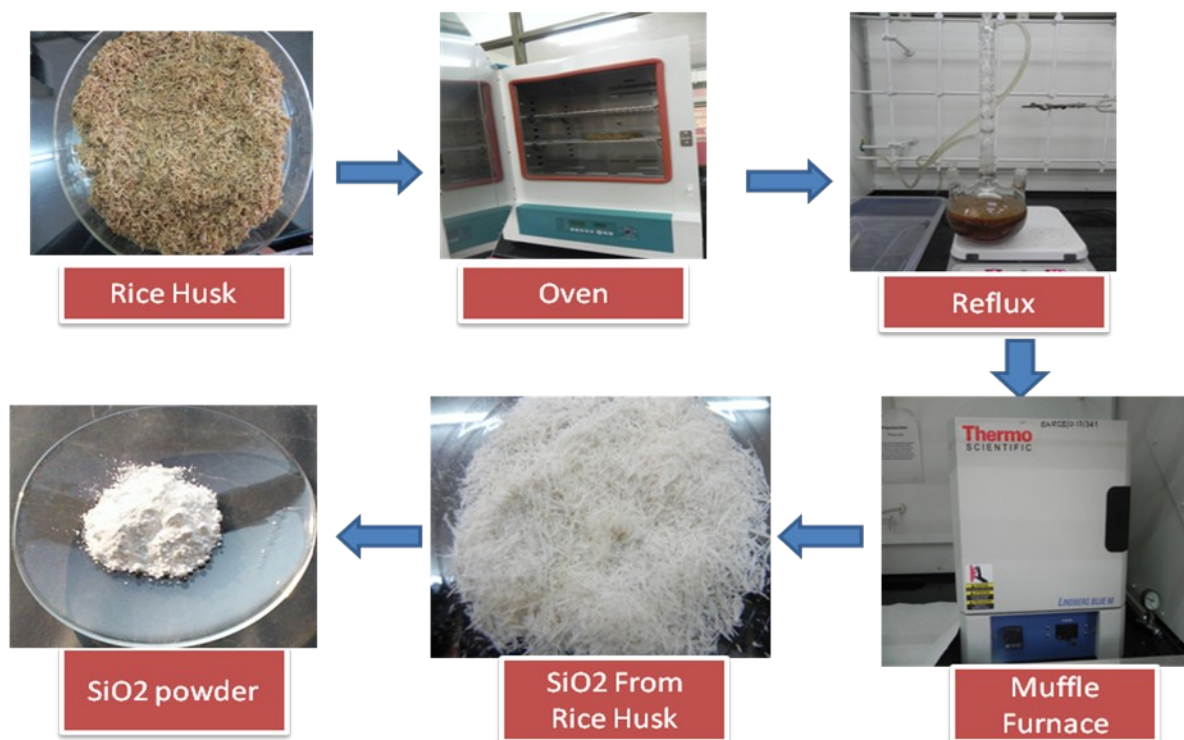

**Fig. S-1** Stepwise synthesis of SiO<sub>2</sub> from rice husk

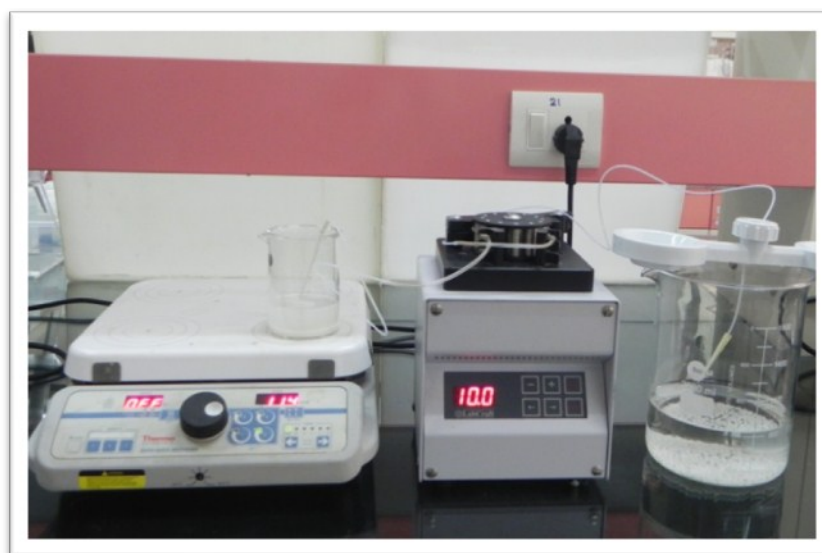

**Fig. S-2:** Set up for AMP-SiO<sub>2</sub>-Ca-Alg bead synthesis

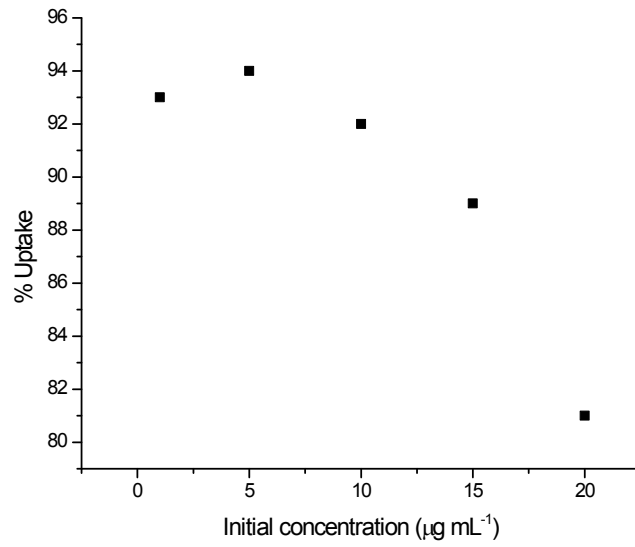

**Fig. S-3:** % uptake of Cs by AMP-SiO<sub>2</sub>-Ca-Alg beads synthesised from commercial silica

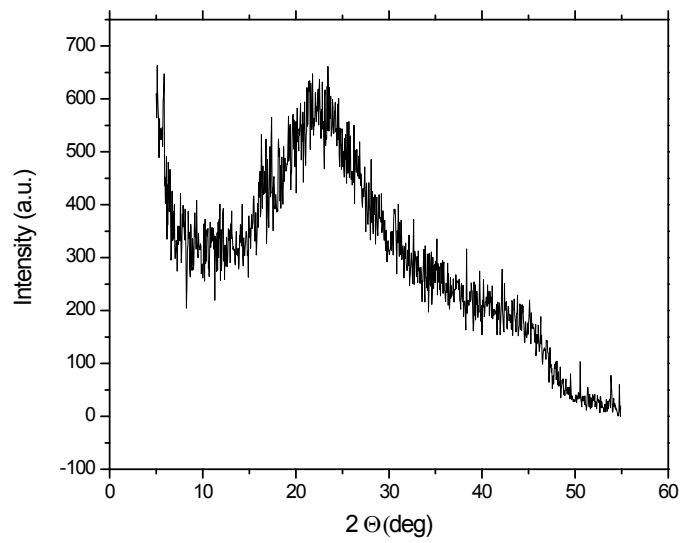

**Fig. S-4:** XRD of AMP modified SiO<sub>2</sub> after regeneration

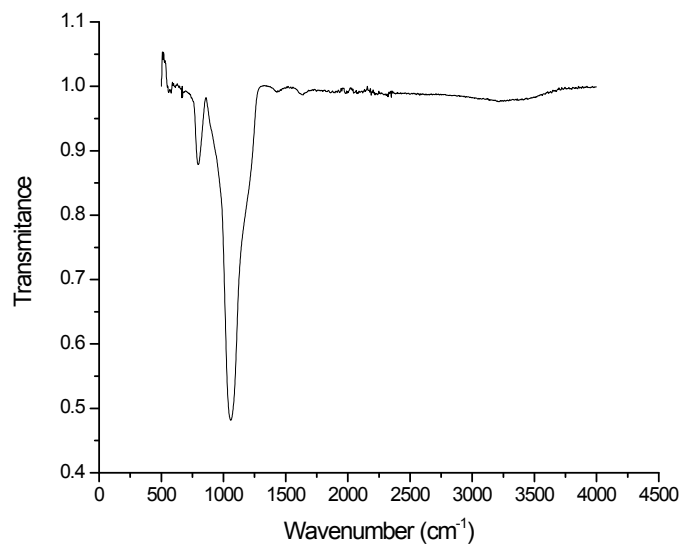

**Fig. S-5:** ATR-FTIR spectra of AMP modified SiO<sub>2</sub> after regeneration

**Table S-1:** Physicochemical characteristics of groundwater before and after removal of Cs using AMP-SiO<sub>2</sub>-Ca-Alg beads

| Parameters treatment                                | Before treatment | After   |
|-----------------------------------------------------|------------------|---------|
| pH                                                  | 5.4–7.3          | 5.6–7.1 |
| Conductance (mS)                                    | 301–412          | 346–388 |
| Redox potential (mV)                                | 111–135          | 123–139 |
| DOC (mg L <sup>-1</sup> )                           | 7–10             | 9–11    |
| Cl <sup>-1</sup> (mg L <sup>-1</sup> )              | 16.6–21.3        | 15.1–   |
| 20.9                                                |                  |         |
| PO <sub>4</sub> <sup>3-</sup> (mg L <sup>-1</sup> ) | 0.53–0.56        | 0.52–   |
| 0.56                                                |                  |         |
| Na (mg L <sup>-1</sup> )                            | 23.1–28.0        | 23.4–   |
| 28.7                                                |                  |         |
| K (mg L <sup>-1</sup> )                             | 0.81–0.90        | 0.87–   |
| 0.89                                                |                  |         |
| Mg (mg L <sup>-1</sup> )                            | 14.4–15.9        | 15.3–   |
| 16.4                                                |                  |         |
| Ca (mg L <sup>-1</sup> )                            | 40.1–43.3        | 38.8–   |
| 44.2                                                |                  |         |
| Cu (mg L <sup>-1</sup> )                            | 4.5–8.3          | 6.1–    |
| 8.9                                                 |                  |         |

---

|                          |           |       |
|--------------------------|-----------|-------|
| Fe (mg L <sup>-1</sup> ) | 1.1–2.4   | 1.2–  |
| 2.3                      |           |       |
| Si (mg L <sup>-1</sup> ) | 32.3–41.5 | 39.0– |
| 48.1                     |           |       |

---

---
